# Supplementary material for: Combined Genome-Wide Association Studies (GWAS) and Linkage Mapping Identifies Genomic Regions Associated with Seedling Root System Architecture (RSA) under Different Nitrogen Conditions in Wheat (<em>Triticum aestivum</em> L.)
Source: Preprints.org preprint supplement (doi:10.20944/preprints202407.1579.v1), 2024-07-19
Supplement: Supplementary file 1 [file supplementary]

## Sheet: Sheet1
TABLE S2 Marker-trait associations for nitrogen use efficiency related traits (P ≤ 0.0001)
Trait	Marker	Chr	Chromosome	P-value	PVE%
RTRS	AX-110604550	6A	215053095	4.32e-13	0.26862
RARD	AX-110910494	5B	391760721	1.43e-11	0.2468
RARD	AX-111027007	5B	420378482	4.1e-11	0.21707
RARD	AX-110702897	5B	393084243	4.19e-11	0.21597
RARD	AX-111544906	5B	456351447	4.52e-11	0.2154
RARD	AX-110613176	5B	69860647	4.55e-11	0.21678
RTRV	AX-110604550	6A	76551868	4.12e-10	0.19797
RARD	AX-108811121	5B	621985858	5.45e-09	0.17044
RARD	AX-95100959	4B	367213399	1.52e-08	0.15854
RARD	AX-109995781	5B	98982871	1.96e-08	0.13925
RARD	AX-108789480	6A	11551719	2.39e-08	0.15456
RARD	AX-111020828	7D	636812060	2.46e-08	0.15434
RARD	AX-94425840	7D	411810535	2.79e-08	0.15377
RARD	AX-108775012	5B	827732018	2.97e-08	0.16476
RTRL	AX-110604550	6A	479373874	3e-08	0.15559
RARD	AX-108931980	3B	638827508	3.21e-08	0.15174
RARD	AX-111133840	5B	292000101	3.23e-08	0.15136
RNRT	AX-110432780	2B	393575217	3.69e-08	0.15181
RNRT	AX-110432780	2B	575111272	3.69e-08	0.15181
RARD	AX-108993206	5B	229443607	4.16e-08	0.14911
RARD	AX-109880626	5B	440466532	4.37e-08	0.16117
RTRS	AX-94807145	1B	393720841	4.84e-08	0.15147
RARD	AX-109897731	2B	534792934	4.94e-08	0.15985
RARD	AX-94524014	5B	488613430	5.2e-08	0.14704
RARD	AX-108894827	5B	683086145	5.61e-08	0.14626
RARD	AX-109378391	5B	397424883	5.9e-08	0.14607
RARD	AX-110567129	5B	122242918	5.99e-08	0.15007
RARD	AX-111632749	7A	406175149	6.08e-08	0.14677
RARD	AX-108826916	5B	407839973	6.2e-08	0.14564
RTRS	AX-109444011	4A	52392343	6.37e-08	0.14854
RARD	AX-95072704	5B	280217865	6.44e-08	0.14514
RARD	AX-110369451	5B	624658102	6.54e-08	0.14473
RTRS	AX-110988913	6A	371304967	6.63e-08	0.14894
RTRS	AX-110061580	2A	456461525	6.71e-08	0.14882
RARD	AX-108947790	4A	489976002	6.73e-08	0.145
RARD	AX-110984014	2B	738207998	6.77e-08	0.14486
RARD	AX-110046880	5B	670370583	6.79e-08	0.14911
RARD	AX-110530149	5B	692868673	7.02e-08	0.14779
RARD	AX-108755606	3B	197670962	7.11e-08	0.14395
RTRS	AX-110968912	4A	392215959	7.19e-08	0.14766
RARD	AX-110914304	7A	57080643	7.22e-08	0.144
RTRS	AX-109333858	6D	142659976	7.96e-08	0.14629
RARD	AX-109288226	5B	464327496	8.28e-08	0.14328
RARD	AX-111285200	5B	304282101	8.3e-08	0.15557
RTRS	AX-94630238	1D	718619997	8.93e-08	0.14583
RARD	AX-94972150	5B	512087177	9.18e-08	0.14156
RTRS	AX-111067750	6D	670816143	9.24e-08	0.14599
RTRS	AX-110528196	2A	388537982	9.42e-08	0.14483
RNRT	AX-110936855	1A	78479375	9.73e-08	0.14627
RNRT	AX-110936855	1A	420003518	9.73e-08	0.14627
RTRS	AX-111131963	4A	420128799	9.8e-08	0.1444
RARD	AX-110447995	5B	456344009	9.8e-08	0.14115
RTRS	AX-110361435	6A	396821659	9.84e-08	0.14514
RARD	AX-111480135	5B	77330231	9.98e-08	0.14078
RARD	AX-111715584	5B	642527391	9.98e-08	0.14078
RARD	AX-111024322	5B	391974297	1.03e-07	0.16476
RARD	AX-108907467	5B	460631400	1.04e-07	0.14087
RTRS	AX-109604549	6B	497916228	1.04e-07	0.1445
RTRS	AX-110394317	7B	83716729	1.1e-07	0.1452
RARD	AX-110498516	5B	670073154	1.11e-07	0.1406
RTRS	AX-111675108	5A	668964559	1.13e-07	0.14329
RARD	AX-110669872	5B	265658997	1.13e-07	0.14378
RARD	AX-111760027	1B	460022965	1.19e-07	0.14291
RARD	AX-109322173	5B	283124178	1.19e-07	0.14453
RTRS	AX-109012162	1B	455598483	1.2e-07	0.14237
RTRS	AX-109819688	6B	664670907	1.22e-07	0.1435
RARD	AX-110994381	5B	65715535	1.23e-07	0.1393
RTRS	AX-95249363	1B	22561670	1.25e-07	0.14199
RTRS	AX-111675287	3B	246194016	1.25e-07	0.14201
RARD	AX-108821811	5B	456461429	1.25e-07	0.13966
RTRS	AX-111595082	7A	396963671	1.25e-07	0.14639
RTRS	AX-109522774	2A	450592212	1.26e-07	0.14372
RTRS	AX-110484149	3B	448840945	1.26e-07	0.14256
RTRS	AX-108892558	3B	505464170	1.26e-07	0.14259
RTRS	AX-109271946	5A	561555127	1.28e-07	0.14175
RARD	AX-110535511	5B	431670917	1.28e-07	0.13853
RTRS	AX-111032927	5D	87160755	1.29e-07	0.14168
RTRS	AX-94449787	6B	466987100	1.29e-07	0.14166
RTRS	AX-94795144	5A	57986705	1.3e-07	0.14282
RARD	AX-110140657	5B	695552323	1.3e-07	0.13849
RTRS	AX-111719215	7D	87946793	1.31e-07	0.1427
RARD	AX-94897485	5A	505502605	1.32e-07	0.13818
RARD	AX-111475036	5B	422413379	1.32e-07	0.13882
RTRS	AX-94474198	5B	464153548	1.32e-07	0.14293
RTRS	AX-108778168	5B	460477169	1.33e-07	0.14245
RTRS	AX-109827387	5A	422428614	1.34e-07	0.14245
RARD	AX-110490527	5B	484081709	1.37e-07	0.13797
RARD	AX-111082332	5B	422600814	1.38e-07	0.14832
RARD	AX-111543069	5B	420654692	1.42e-07	0.13765
RARD	AX-94428790	5B	461299240	1.42e-07	0.13817
RARD	AX-111556376	5A	420288662	1.44e-07	0.13736
RARD	AX-110434168	5B	537593828	1.45e-07	0.13728
RARD	AX-109279576	5B	670433939	1.45e-07	0.13841
RARD	AX-110477130	5B	719301897	1.46e-07	0.13731
RARD	AX-110398670	5B	613004916	1.51e-07	0.13821
RTRS	AX-110476242	5B	22803813	1.53e-07	0.14246
RTRS	AX-110573635	4A	676273493	1.6e-07	0.13976
RARD	AX-94979220	3A	673355243	1.73e-07	0.13642
RTRS	AX-109268730	2D	675085464	1.84e-07	0.14373
RTRS	AX-94831312	6A	675203014	2.2e-07	0.14954
RTRS	AX-110378252	4A	675792443	2.24e-07	0.13641
RTRS	AX-111010012	4A	673828956	2.36e-07	0.13622
RTRS	AX-110145869	4A	500025445	2.36e-07	0.13622
RTRS	AX-111508639	4A	676317399	2.41e-07	0.13579
RTRS	AX-108863171	4A	675225793	2.42e-07	0.13606
RTRS	AX-108904309	4A	673406821	2.42e-07	0.13608
RARD	AX-111122370	2A	675527309	2.45e-07	0.13304
RTRS	AX-109391062	4A	675590923	2.45e-07	0.13572
RTRS	AX-94431585	4A	674557613	2.66e-07	0.13568
RTRS	AX-111289945	4A	674198386	2.67e-07	0.13487
RTRS	AX-110083098	4A	122930235	2.72e-07	0.13472
RTRS	AX-109338647	4A	56945020	2.74e-07	0.1346
RTRS	AX-108949192	4A	593365784	2.8e-07	0.13432
RTRS	AX-109380883	4A	676229435	2.81e-07	0.13444
RNRT	AX-111591545	7B	674456567	3.01e-07	0.1331
RNRT	AX-111591545	7B	673490248	3.01e-07	0.1331
RTRS	AX-110636909	7D	674242883	3.17e-07	0.13412
RTRS	AX-95135934	7B	674261303	3.19e-07	0.13392
RTRS	AX-111216054	4A	674385540	3.22e-07	0.13345
RTRS	AX-110989797	4A	676304892	3.23e-07	0.13381
RTRS	AX-111175210	4A	56357539	3.26e-07	0.13288
RTRS	AX-108930907	4A	553170075	3.26e-07	0.13288
RTRS	AX-110424384	4A	55951835	3.26e-07	0.13288
RTRS	AX-109004049	4A	545258500	3.26e-07	0.13288
RTRS	AX-110481053	4A	676209047	3.26e-07	0.13288
RTRS	AX-109339265	7D	673214492	3.26e-07	0.13288
RTRS	AX-111214151	7D	674446404	3.28e-07	0.13285
RTRS	AX-110999005	3B	673445052	3.3e-07	0.13289
RTRS	AX-108856573	3D	673670039	3.35e-07	0.13288
RTRS	AX-109456186	4A	62787573	3.38e-07	0.13275
RTRS	AX-111504572	4A	674554339	3.38e-07	0.13271
RTRS	AX-108968987	4A	673488781	3.39e-07	0.13356
RTRS	AX-108824108	4A	675800837	3.47e-07	0.13258
RTRS	AX-111656554	4A	582491885	3.77e-07	0.13151
RTRS	AX-94436847	7A	675586769	3.82e-07	0.13261
RTRS	AX-111072935	4A	127188563	3.88e-07	0.13209
RTRS	AX-110516303	4A	673442772	3.9e-07	0.13116
RTRS	AX-109568894	4A	684418763	4.04e-07	0.13085
RTRS	AX-109823915	6A	636182697	4.17e-07	0.13055
RTRS	AX-109856517	4A	676420024	4.19e-07	0.13065
RTRS	AX-95145751	6A	634957604	4.2e-07	0.13307
RTRS	AX-110627995	4A	594378861	4.22e-07	0.1305
RTRS	AX-111555457	4A	674537771	4.37e-07	0.1301
RTRS	AX-109910829	7A	614410431	4.46e-07	0.13002
RTRS	AX-109996888	4A	629475240	4.5e-07	0.13061
RTRS	AX-94400356	7A	684279904	4.65e-07	0.12952
RTRS	AX-111192023	4A	684392011	4.74e-07	0.12933
RTRS	AX-111163736	7B	677564645	4.74e-07	0.12937
RTRS	AX-110914807	4A	684308550	4.75e-07	0.13488
RTRS	AX-110359940	4A	684372068	4.82e-07	0.12941
RTRS	AX-111501623	4A	640095050	4.96e-07	0.12891
RTRS	AX-110744548	4A	641074392	4.99e-07	0.12897
RTRS	AX-111532152	4A	673126936	5.04e-07	0.12883
RTRS	AX-108752344	4A	553965086	5.08e-07	0.13044
RTRS	AX-111489771	4A	639253003	5.23e-07	0.12868
RTRS	AX-108918294	7A	505996814	5.25e-07	0.12874
RTRS	AX-111240065	7A	477921541	5.39e-07	0.12846
RTRS	AX-111484271	4A	629381264	5.43e-07	0.12832
RTRS	AX-109394537	5D	684517980	5.54e-07	0.12935
RTRS	AX-109973591	7A	684576579	5.61e-07	0.12786
RTRS	AX-111634281	5A	690893656	5.64e-07	0.13468
RNRT	AX-111073439	5B	16401406	5.83e-07	0.12581
RNRT	AX-111073439	5B	646254985	5.83e-07	0.12581
RTRS	AX-111500952	4A	477577384	6.05e-07	0.12771
RTRS	AX-111809188	4A	600406868	6.17e-07	0.12719
RTRS	AX-111130760	4A	535694078	6.17e-07	0.12719
RNRT	AX-110009007	2B	384772273	6.23e-07	0.14119
RNRT	AX-110009007	2B	428381717	6.23e-07	0.14119
RTRS	AX-109412514	6A	684657019	6.26e-07	0.12684
RTRS	AX-110009007	2B	628902382	6.33e-07	0.1309
RNRT	AX-110444159	6B	632156296	6.47e-07	0.12508
RNRT	AX-110444159	6B	684616464	6.47e-07	0.12508
RTRS	AX-110611597	4D	471153668	6.55e-07	0.12683
RTRS	AX-110391632	6A	554350778	6.55e-07	0.12639
RTRS	AX-94495398	3D	7471705	6.66e-07	0.12773
RARD	AX-110466778	5D	636581034	6.9e-07	0.12884
RTRV	AX-110957008	4D	640473295	6.91e-07	0.12591
RTRS	AX-108783587	4A	444542206	6.97e-07	0.12595
RTRS	AX-110566869	4A	434028440	7.15e-07	0.12554
RTRS	AX-109081470	4A	263940049	7.16e-07	0.12548
RTRS	AX-95630865	4A	554359097	7.17e-07	0.12651
RTRS	AX-109829714	1A	711964410	7.2e-07	0.12627
RTRS	AX-109920426	5D	637697005	7.25e-07	0.12979
RTRS	AX-109005230	1D	684518879	7.33e-07	0.12577
RTRS	AX-111550590	4A	559015826	7.47e-07	0.12505
RTRS	AX-109286359	7A	391826798	7.57e-07	0.12567
RNRT	AX-111419172	6D	44631942	7.65e-07	0.12358
RNRT	AX-111419172	6D	294373565	7.65e-07	0.12358
RTRV	AX-110399382	4D	609616069	7.85e-07	0.12465
RTRS	AX-109427543	5B	674299007	8.17e-07	0.12483
RTRS	AX-109950773	5D	684515594	8.19e-07	0.12957
RTRS	AX-110568430	5B	704313266	8.23e-07	0.12414
RTRS	AX-109433855	4A	684476260	8.37e-07	0.12401
RTRS	AX-109339037	4A	601262512	8.55e-07	0.12378
RTRS	AX-111472617	6A	348571044	8.76e-07	0.12432
RARD	AX-109523135	5B	299648885	8.89e-07	0.12074
RARD	AX-95120498	7B	582140176	8.98e-07	0.12049
RTRS	AX-95210597	2B	448932822	9.15e-07	0.12539
RNRT	AX-109450262	3D	1627295	9.45e-07	0.12212
RNRT	AX-109450262	3D	458505241	9.45e-07	0.12212
RTRS	AX-111680821	4A	738022965	9.65e-07	0.14315
RTRS	AX-108893416	4A	626809276	9.76e-07	0.12253
RTRS	AX-110444159	6B	89829326	1.02e-06	0.12297
RTRS	AX-111604026	3B	436713442	1.03e-06	0.1237
RTRS	AX-111462385	2D	449544715	1.04e-06	0.12228
RTRS	AX-110669459	3B	513023703	1.04e-06	0.12229
RTRS	AX-108816903	6A	241675995	1.07e-06	0.124
RTRS	AX-110973389	3D	219566604	1.08e-06	0.12158
RTRS	AX-109829846	6A	288406967	1.08e-06	0.12441
RTRS	AX-94833934	5D	637785256	1.11e-06	0.12131
RTRS	AX-95130583	7A	447637956	1.11e-06	0.12242
RTRS	AX-95119347	2D	601078418	1.12e-06	0.13011
RNRT	AX-109927666	4A	47255031	1.12e-06	0.13972
RNRT	AX-109927666	4A	360604270	1.12e-06	0.13972
RTRS	AX-111524893	7A	561510557	1.13e-06	0.12298
RNRT	AX-110439664	1A	638166457	1.14e-06	0.13209
RNRT	AX-110439664	1A	728222202	1.14e-06	0.13209
RARD	AX-110869342	6D	456314225	1.14e-06	0.11886
RTRS	AX-94841808	6D	314901830	1.14e-06	0.12107
RTRS	AX-110538118	5B	223556274	1.19e-06	0.12095
RTRS	AX-109547730	6A	33445537	1.21e-06	0.12131
RTRS	AX-111080766	3B	196601846	1.22e-06	0.12126
RTRS	AX-111655582	6A	197036172	1.22e-06	0.1213
RTRS	AX-94621740	6D	188171234	1.22e-06	0.12123
RTRS	AX-94727693	6D	203316992	1.22e-06	0.12114
RTRS	AX-109320445	7A	340919639	1.22e-06	0.12672
RTRS	AX-94535772	7B	216461559	1.23e-06	0.12079
RTRS	AX-110534133	7B	246416939	1.24e-06	0.12105
RTRS	AX-94389554	7A	202460827	1.25e-06	0.12028
RTRS	AX-110122543	5B	211678211	1.26e-06	0.12358
RTRS	AX-109466751	3A	217677342	1.27e-06	0.12069
RTRS	AX-94800259	7A	681545985	1.27e-06	0.12007
RTRS	AX-111692244	6A	219705505	1.28e-06	0.12207
RTRS	AX-94473748	6A	188790162	1.28e-06	0.12114
RTRS	AX-109592379	5A	273932240	1.29e-06	0.11991
RTRS	AX-111843901	5D	193832585	1.29e-06	0.11996
RTRS	AX-110044152	6A	204445068	1.29e-06	0.11996
RTRS	AX-111709480	6A	213677482	1.29e-06	0.12008
RTRS	AX-109072029	6A	214853377	1.29e-06	0.11993
RTRS	AX-109432438	6A	216302681	1.29e-06	0.11997
RTRS	AX-109611560	6A	216608911	1.29e-06	0.11997
RTRS	AX-111168696	6A	216658260	1.29e-06	0.11997
RTRS	AX-94629953	6A	218441650	1.29e-06	0.11997
RTRS	AX-86164758	6D	222700146	1.29e-06	0.11997
RTRS	AX-86173258	6D	262629690	1.29e-06	0.11997
RTRS	AX-95160997	3D	457229489	1.3e-06	0.12058
RTRS	AX-111558776	4D	357679531	1.3e-06	0.11985
RTRS	AX-109459714	6A	295399152	1.3e-06	0.11988
RTRS	AX-110930855	6A	157441798	1.3e-06	0.11988
RTRS	AX-108802556	6A	223944797	1.3e-06	0.12199
RTRS	AX-109610605	6A	344945457	1.3e-06	0.11985
RTRS	AX-111270957	6A	41538660	1.3e-06	0.11985
RTRS	AX-110721243	6A	184159055	1.3e-06	0.11985
RTRS	AX-110165966	6A	57901233	1.3e-06	0.11985
RTRS	AX-108755116	6A	431175254	1.3e-06	0.11985
RTRS	AX-109405685	6A	391762153	1.3e-06	0.11985
RTRS	AX-110724073	6A	554349522	1.3e-06	0.11985
RTRS	AX-109579701	6A	199696567	1.3e-06	0.11985
RTRS	AX-111544672	6A	268882994	1.3e-06	0.11985
RTRS	AX-108848382	6A	431176531	1.3e-06	0.11985
RTRS	AX-111760815	6A	317276459	1.3e-06	0.11985
RTRS	AX-109962925	6A	197816599	1.3e-06	0.11985
RTRS	AX-110680451	6A	431175909	1.3e-06	0.11986
RTRS	AX-109445014	6D	47598727	1.3e-06	0.11985
RTRS	AX-109400964	6D	561280845	1.3e-06	0.11985
RTRS	AX-110669722	5D	461046720	1.31e-06	0.12
RTRS	AX-109569056	6A	621220538	1.31e-06	0.11983
RTRS	AX-110468252	6A	711586265	1.31e-06	0.11988
RTRS	AX-109430066	6A	693729833	1.32e-06	0.11979
RTRS	AX-94400823	6A	708962294	1.32e-06	0.12034
RTRS	AX-108738308	6A	763047848	1.32e-06	0.12024
RTRS	AX-111059820	6A	709079749	1.32e-06	0.12013
RTRS	AX-111533264	7B	637652755	1.32e-06	0.12227
RTRS	AX-109851519	2B	104479558	1.33e-06	0.11994
RTRS	AX-94715713	4A	520781811	1.33e-06	0.12625
RTRS	AX-111540890	6D	422540206	1.33e-06	0.12183
RTRS	AX-94453762	6A	516701777	1.34e-06	0.12005
RTRS	AX-110390807	6D	729134238	1.34e-06	0.12033
RTRS	AX-110924288	7D	38447558	1.35e-06	0.13118
RTRS	AX-110924288	7D	648438464	1.35e-06	0.13118
RTRS	AX-95206757	2D	499426052	1.36e-06	0.12013
RTRS	AX-108804567	2B	446919958	1.41e-06	0.12358
RTRV	AX-109840288	4A	422114458	1.41e-06	0.12019
RTRV	AX-110470671	4A	455538393	1.42e-06	0.11974
RTRS	AX-94826225	2A	458628271	1.43e-06	0.12554
RTRV	AX-109341968	4A	414828506	1.45e-06	0.11892
RNRT	AX-109320445	7A	116393750	1.48e-06	0.12081
RNRT	AX-109320445	7A	466740065	1.48e-06	0.12081
RTRS	AX-94587262	2D	422413147	1.52e-06	0.12496
RARD	AX-109428196	7D	76643969	1.55e-06	0.11549
RARD	AX-94445455	5D	501583459	1.59e-06	0.11546
RTRV	AX-94831312	6A	618981015	1.65e-06	0.13668
RNRT	AX-110657078	1A	671715102	1.91e-06	0.11527
RNRT	AX-110657078	1A	697275296	1.91e-06	0.11527
RTRV	AX-110476242	5B	414875521	1.99e-06	0.11852
RNRT	AX-109829714	1A	75141518	2.18e-06	0.11452
RNRT	AX-109829714	1A	526954732	2.18e-06	0.11452
RARD	AX-110432375	2B	580395262	2.2e-06	0.11226
RARD	AX-111518792	1B	697456541	2.21e-06	0.1124
RARD	AX-94853760	6A	697460195	2.29e-06	0.11191
RARD	AX-110452387	1A	697390288	2.31e-06	0.11257
RARD	AX-108994128	2A	422448577	2.34e-06	0.11265
RNRT	AX-110359940	4A	499647407	2.51e-06	0.11271
RNRT	AX-110359940	4A	697454350	2.51e-06	0.11271
RNRT	AX-94495398	3D	670441134	2.54e-06	0.11407
RNRT	AX-94495398	3D	613801945	2.54e-06	0.11407
RARD	AX-108842505	3B	43368540	2.62e-06	0.11072
RNRT	AX-111540890	6D	499942203	2.63e-06	0.1224
RNRT	AX-111540890	6D	708098010	2.63e-06	0.1224
RTRV	AX-111131963	4A	697456504	2.67e-06	0.11323
RTRV	AX-110968912	4A	719398695	2.76e-06	0.11373
RARD	AX-111049355	3A	546927841	2.85e-06	0.10999
RNRT	AX-110090236	2B	99202463	2.88e-06	0.11225
RNRT	AX-110090236	2B	508318419	2.88e-06	0.11225
RNRT	AX-111032548	2D	497398392	3.02e-06	0.111
RNRT	AX-111032548	2D	664449435	3.02e-06	0.111
RARD	AX-111449202	1A	18590536	3.04e-06	0.11883
RARD	AX-110447607	2A	76656840	3.05e-06	0.10943
RARD	AX-110082491	3A	496672709	3.16e-06	0.10985
RNRT	AX-108726203	7A	546328652	3.26e-06	0.11008
RNRT	AX-108726203	7A	232739363	3.26e-06	0.11008
RNRT	AX-111500952	4A	12994610	3.29e-06	0.11045
RNRT	AX-111500952	4A	71339738	3.29e-06	0.11045
RTRV	AX-111067750	6D	239330712	3.38e-06	0.11173
RARD	AX-109885521	3A	546369371	3.54e-06	0.10841
RTRL	AX-111550723	6A	458643661	3.66e-06	0.11535
RNRT	AX-94454164	2A	547824274	3.67e-06	0.10985
RNRT	AX-94454164	2A	697470598	3.67e-06	0.10985
RNRT	AX-108920135	7A	263941651	3.72e-06	0.11015
RNRT	AX-108920135	7A	497681367	3.72e-06	0.11015
RARD	AX-95630609	3A	40290071	3.82e-06	0.10725
RARD	AX-109314044	3A	366123785	3.82e-06	0.10725
RARD	AX-86179653	3A	655174247	3.83e-06	0.10726
RTRV	AX-95135934	7B	546112035	3.9e-06	0.1103
RNRT	AX-111462385	2D	546461221	3.97e-06	0.10818
RNRT	AX-111462385	2D	91649494	3.97e-06	0.10818
RNRT	AX-94715713	4A	315897006	4e-06	0.11244
RNRT	AX-94715713	4A	656232239	4e-06	0.11244
RTRV	AX-110378252	4A	675128993	4e-06	0.10944
RARD	AX-108934393	1A	14627369	4.05e-06	0.10719
RNRT	AX-110534133	7B	87909440	4.07e-06	0.10791
RNRT	AX-110534133	7B	545833704	4.07e-06	0.10791
RARD	AX-94385489	3A	546103774	4.09e-06	0.10694
RTRL	AX-109823915	6A	546106752	4.19e-06	0.10889
RTRS	AX-94399532	4A	546402821	4.22e-06	0.1091
RNRT	AX-111550590	4A	367899324	4.27e-06	0.10743
RNRT	AX-111550590	4A	565972547	4.27e-06	0.10743
RTRV	AX-111214151	7D	719488097	4.28e-06	0.10909
RTRV	AX-111010012	4A	497732777	4.3e-06	0.1095
RTRV	AX-110145869	4A	404912727	4.3e-06	0.1095
RTRV	AX-108904309	4A	381826686	4.3e-06	0.10951
RARD	AX-110477463	3D	729841	4.38e-06	0.10931
RTRV	AX-108863171	4A	545833109	4.39e-06	0.10937
RTRV	AX-110391632	6A	312765172	4.41e-06	0.10884
RTRV	AX-110573635	4A	465232146	4.46e-06	0.10849
RNRT	AX-109936311	5B	103045513	4.46e-06	0.10704
RNRT	AX-109936311	5B	708739867	4.46e-06	0.10704
RARD	AX-111009304	1B	528077779	4.48e-06	0.10606
RARD	AX-110960598	1A	104525540	4.53e-06	0.10581
RTRV	AX-111533049	4A	708463565	4.53e-06	0.10977
RARD	AX-111161925	3A	510895482	4.54e-06	0.10585
RARD	AX-94448736	3A	546368998	4.56e-06	0.10577
RNRT	AX-108844245	1B	546370443	4.57e-06	0.11002
RNRT	AX-108844245	1B	87122174	4.57e-06	0.11002
RTRV	AX-109394537	5D	545346713	4.64e-06	0.11058
RTRV	AX-111163736	7B	379724216	4.67e-06	0.10855
RNRT	AX-109433855	4A	3873905	4.69e-06	0.10671
RNRT	AX-109433855	4A	680044860	4.69e-06	0.10671
RTRV	AX-111555457	4A	715701582	4.69e-06	0.10798
RNRT	AX-94389554	7A	346461714	4.69e-06	0.10663
RNRT	AX-94389554	7A	115942310	4.69e-06	0.10663
RNRT	AX-94841808	6D	545346810	4.74e-06	0.10649
RNRT	AX-94841808	6D	478669996	4.74e-06	0.10649
RTRV	AX-110914807	4A	57874157	4.75e-06	0.11335
RNRT	AX-94800259	7A	41167437	4.76e-06	0.10645
RNRT	AX-94800259	7A	466006048	4.76e-06	0.10645
RNRT	AX-111558776	4D	82210638	4.77e-06	0.10642
RNRT	AX-111558776	4D	202379897	4.77e-06	0.10642
RARD	AX-110531147	7A	287377965	4.83e-06	0.10529
RNRT	AX-111537855	1A	57950751	4.85e-06	0.10673
RNRT	AX-111537855	1A	606160092	4.85e-06	0.10673
RNRT	AX-111537840	1A	465150785	4.85e-06	0.10345
RNRT	AX-109394537	5D	749186047	4.89e-06	0.10732
RNRT	AX-109394537	5D	34542244	4.89e-06	0.10732
RARD	AX-111555215	7B	115641096	4.89e-06	0.10911
RNRT	AX-95119347	2D	71969967	4.9e-06	0.10744
RNRT	AX-95119347	2D	634522327	4.9e-06	0.10744
RNRT	AX-110566869	4A	455320235	4.9e-06	0.10634
RNRT	AX-110566869	4A	466175016	4.9e-06	0.10634
RARD	AX-108841628	1A	35524674	4.91e-06	0.10528
RARD	AX-95232405	1B	765015344	4.91e-06	0.09392
RNRT	AX-109081470	4A	121996795	4.93e-06	0.10627
RNRT	AX-109081470	4A	545854800	4.93e-06	0.10627
RNRT	AX-111843901	5D	432484149	4.96e-06	0.10607
RNRT	AX-111843901	5D	47264392	4.96e-06	0.10607
RNRT	AX-109005230	1D	564146564	5e-06	0.10617
RNRT	AX-109005230	1D	165332461	5e-06	0.10617
RTRV	AX-110636909	7D	587769521	5e-06	0.10805
RTRV	AX-110359940	4A	499075855	5.06e-06	0.10756
RARD	AX-109888865	3B	455829082	5.07e-06	0.10548
RTRV	AX-94431585	4A	67057028	5.08e-06	0.10807
RNRT	AX-111080766	3B	420289634	5.11e-06	0.10925
RNRT	AX-111080766	3B	613712862	5.11e-06	0.10925
RARD	AX-109471737	5A	545639231	5.11e-06	0.10646
RTRV	AX-111550590	4A	300221910	5.14e-06	0.10712
RARD	AX-109998609	1B	512487774	5.17e-06	0.10636
RTRV	AX-108949192	4A	800061156	5.17e-06	0.10707
RTRV	AX-94400356	7A	721771140	5.19e-06	0.10703
RTRV	AX-110989797	4A	704409047	5.21e-06	0.10761
RARD	AX-94390732	6B	389981599	5.24e-06	0.10467
RTRV	AX-109973591	7A	13599534	5.25e-06	0.10695
RTRL	AX-111500952	4A	385129646	5.29e-06	0.1074
RNRT	AX-110581484	2D	670117176	5.3e-06	0.10581
RNRT	AX-110581484	2D	512951240	5.3e-06	0.10581
RTRV	AX-111500952	4A	230904919	5.3e-06	0.10694
RTRV	AX-111508639	4A	676347048	5.41e-06	0.10673
RTRV	AX-109391062	4A	314643898	5.42e-06	0.10672
RTRV	AX-94599879	2B	476812760	5.44e-06	0.10689
RARD	AX-111537360	5A	70091267	5.44e-06	0.10627
RNRT	AX-94587262	2D	69865072	5.45e-06	0.11531
RNRT	AX-94587262	2D	67959361	5.45e-06	0.11531
RNRT	AX-110604550	6A	391711200	5.5e-06	0.10513
RNRT	AX-110604550	6A	58802242	5.5e-06	0.10513
RTRV	AX-109910829	7A	2000254	5.5e-06	0.10655
RNRT	AX-111008080	1A	65770421	5.51e-06	0.10512
RNRT	AX-111008080	1A	456263505	5.51e-06	0.10512
RARD	AX-94737344	1B	753412001	5.51e-06	0.09385
RARD	AX-108857128	2A	751004594	5.51e-06	0.09079
RNRT	AX-110924288	7D	681813836	5.53e-06	0.10973
RNRT	AX-110924288	7D	396621881	5.53e-06	0.10973
RTRV	AX-108968987	4A	328446349	5.54e-06	0.10771
RTRV	AX-111240065	7A	68254586	5.57e-06	0.10642
RTRL	AX-110359940	4A	63846962	5.59e-06	0.10697
RNRT	AX-110396853	6B	309380304	5.61e-06	0.10526
RNRT	AX-110396853	6B	33715634	5.61e-06	0.10526
RTRV	AX-108918294	7A	671596669	5.62e-06	0.10637
RTRV	AX-111289945	4A	379270103	5.64e-06	0.10665
RTRV	AX-94715713	4A	466429030	5.69e-06	0.10874
RTRV	AX-110083098	4A	62027088	5.69e-06	0.10635
RNRT	AX-94727693	6D	64424990	5.77e-06	0.10472
RNRT	AX-94727693	6D	303910750	5.77e-06	0.10472
RTRV	AX-111809188	4A	283742731	5.78e-06	0.10645
RTRV	AX-111130760	4A	454588077	5.78e-06	0.10645
RTRV	AX-109338647	4A	496739545	5.79e-06	0.10604
RTRV	AX-109978904	3B	499660178	5.9e-06	0.10662
RTRV	AX-109380883	4A	460270858	5.9e-06	0.10592
RTRV	AX-95210597	2B	63362305	5.91e-06	0.10955
RNRT	AX-109950773	5D	512713747	5.91e-06	0.10505
RNRT	AX-109950773	5D	494111783	5.91e-06	0.10505
RTRV	AX-108752344	4A	433321609	5.92e-06	0.10756
RTRV	AX-94800259	7A	505485857	5.93e-06	0.1058
RTRV	AX-108856573	3D	546399599	5.96e-06	0.10584
RTRV	AX-111175210	4A	701140779	5.98e-06	0.10572
RTRV	AX-108930907	4A	72058529	5.98e-06	0.10572
RTRV	AX-110424384	4A	498843457	5.98e-06	0.10572
RTRV	AX-109004049	4A	1133026	5.98e-06	0.10572
RTRV	AX-110481053	4A	76272733	5.98e-06	0.10572
RTRV	AX-109339265	7D	588527615	5.98e-06	0.10572
RARD	AX-109075567	7D	70909534	6e-06	0.11027
RNRT	AX-108913156	1A	79560313	6.01e-06	0.10459
RNRT	AX-108913156	1A	401620735	6.01e-06	0.10459
RARD	AX-108994128	2A	794663218	6.01e-06	0.11265
RNRT	AX-94826225	2A	32666995	6.01e-06	0.1251
RTRV	AX-111504572	4A	210864675	6.01e-06	0.1057
RTRV	AX-111216054	4A	117992957	6.02e-06	0.10573
RTRV	AX-109456186	4A	69654023	6.02e-06	0.10571
RTRV	AX-110999005	3B	519676987	6.05e-06	0.10573
RTRV	AX-94389554	7A	77683815	6.06e-06	0.10572
RTRV	AX-109081470	4A	434481792	6.12e-06	0.10579
RARD	AX-110948370	6A	498844671	6.12e-06	0.103
RNRT	AX-94400823	6A	498330057	6.12e-06	0.10522
RNRT	AX-94400823	6A	660538322	6.12e-06	0.10522
RTRL	AX-111214151	7D	719470788	6.13e-06	0.10581
RTRV	AX-110627995	4A	458399875	6.14e-06	0.10554
RNRT	AX-110914807	4A	68879938	6.15e-06	0.10475
RTRV	AX-109829714	1A	497904335	6.19e-06	0.10596
RTRL	AX-94826225	2A	58761326	6.19e-06	0.09949
RARD	AX-109300485	3A	254106354	6.22e-06	0.10286
RTRS	AX-108775157	5B	546580029	6.26e-06	0.10619
RTRV	AX-94436847	7A	71145019	6.28e-06	0.10659
RTRV	AX-111501623	4A	467378123	6.3e-06	0.10524
RTRV	AX-111484271	4A	633417835	6.3e-06	0.10556
RTRV	AX-111532152	4A	710274900	6.32e-06	0.10523
RTRV	AX-111656554	4A	84071100	6.33e-06	0.10519
RTRV	AX-111489771	4A	117075071	6.35e-06	0.10522
RARD	AX-111152509	5A	388609531	6.37e-06	0.10466
RNRT	AX-109920426	5D	576025043	6.43e-06	0.1038
RNRT	AX-109920426	5D	72115435	6.43e-06	0.1038
RNRT	AX-109568894	4A	463968307	6.44e-06	0.10368
RNRT	AX-109568894	4A	754303146	6.44e-06	0.10368
RNRT	AX-108785732	3B	458324634	6.45e-06	0.104
RNRT	AX-108785732	3B	73391478	6.45e-06	0.104
RTRV	AX-109907647	4A	533927901	6.45e-06	0.10552
RNRT	AX-110573635	4A	459401319	6.51e-06	0.1037
RNRT	AX-110573635	4A	699725377	6.51e-06	0.1037
RNRT	AX-111270957	6A	738382266	6.57e-06	0.10351
RNRT	AX-111270957	6A	123271886	6.57e-06	0.10351
RTRV	AX-94727693	6D	477627719	6.58e-06	0.1054
RTRV	AX-110516303	4A	575266836	6.59e-06	0.10482
RTRV	AX-108824108	4A	657523225	6.59e-06	0.10595
RNRT	AX-111072935	4A	204502655	6.61e-06	0.10377
RNRT	AX-111072935	4A	675665865	6.61e-06	0.10377
RNRT	AX-108828163	1A	167004799	6.62e-06	0.10345
RNRT	AX-111537840	1A	179859202	6.62e-06	0.10345
RNRT	AX-111537840	1A	182488206	6.62e-06	0.10345
RNRT	AX-108810386	1A	268016427	6.62e-06	0.10345
RNRT	AX-108810386	1A	346450016	6.62e-06	0.10345
RNRT	AX-108828163	1A	429904945	6.62e-06	0.10345
RNRT	AX-111289945	4A	18783109	6.62e-06	0.10382
RNRT	AX-109338647	4A	301907928	6.62e-06	0.10373
RNRT	AX-109338647	4A	506404035	6.62e-06	0.10373
RNRT	AX-109856517	4A	140023569	6.63e-06	0.10356
RNRT	AX-109856517	4A	456894787	6.63e-06	0.10356
RARD	AX-110076011	7D	514868397	6.67e-06	0.10291
RNRT	AX-94833934	5D	184727307	6.69e-06	0.10333
RNRT	AX-94833934	5D	58495443	6.69e-06	0.10333
RTRS	AX-109483556	4A	472446336	6.74e-06	0.10456
RNRT	AX-94826225	2A	470282801	6.78e-06	0.1251
RNRT	AX-94826225	2A	232595357	6.78e-06	0.1251
RNRT	AX-111524893	7A	123311116	6.91e-06	0.105
RNRT	AX-111524893	7A	40784745	6.91e-06	0.105
RTRV	AX-109920426	5D	454872283	6.92e-06	0.10919
RTRV	AX-110568430	5B	483746310	6.95e-06	0.10433
RNRT	AX-111746044	6A	470229573	7e-06	0.10499
RNRT	AX-111746044	6A	646215564	7e-06	0.10499
RTRV	AX-109286359	7A	57683838	7.03e-06	0.10498
RTRV	AX-109823915	6A	61075901	7.05e-06	0.1042
RTRV	AX-94495398	3D	678626032	7.06e-06	0.10475
RTRV	AX-111072935	4A	69542823	7.08e-06	0.10475
RTRV	AX-110122543	5B	702751542	7.08e-06	0.10768
RTRV	AX-108783587	4A	603311356	7.11e-06	0.1048
RTRV	AX-110566869	4A	490525165	7.14e-06	0.10461
RNRT	AX-110669722	5D	752463654	7.15e-06	0.1029
RNRT	AX-110669722	5D	362206225	7.15e-06	0.1029
RNRT	AX-111655582	6A	490091485	7.15e-06	0.10282
RNRT	AX-111655582	6A	542039161	7.15e-06	0.10282
RNRT	AX-109072029	6A	499138679	7.18e-06	0.1027
RNRT	AX-109072029	6A	28258377	7.18e-06	0.1027
RTRV	AX-108816903	6A	613606505	7.2e-06	0.10664
RNRT	AX-108816903	6A	417559433	7.21e-06	0.10355
RNRT	AX-108816903	6A	372621378	7.21e-06	0.10355
RNRT	AX-108780928	6A	166489298	7.21e-06	0.10265
RNRT	AX-108780928	6A	530631438	7.21e-06	0.10265
RNRT	AX-109547730	6A	621085638	7.22e-06	0.10271
RNRT	AX-109547730	6A	152874691	7.22e-06	0.10271
RTRV	AX-109996888	4A	503399786	7.23e-06	0.10453
RNRT	AX-110390807	6D	13312307	7.23e-06	0.10943
RNRT	AX-110390807	6D	639240176	7.23e-06	0.10943
RTRL	AX-111163736	7B	62714147	7.23e-06	0.10389
RNRT	AX-111692244	6A	38656744	7.27e-06	0.10265
RNRT	AX-111692244	6A	532422604	7.27e-06	0.10265
RTRV	AX-110444159	6B	57825250	7.27e-06	0.10457
RNRT	AX-109610605	6A	698510084	7.29e-06	0.10256
RNRT	AX-110721243	6A	535029581	7.29e-06	0.10256
RNRT	AX-110165966	6A	535034673	7.29e-06	0.10256
RNRT	AX-108755116	6A	535037110	7.29e-06	0.10256
RNRT	AX-109405685	6A	535040679	7.29e-06	0.10256
RNRT	AX-110724073	6A	549467297	7.29e-06	0.10256
RNRT	AX-109445014	6D	520831079	7.29e-06	0.10256
RNRT	AX-109400964	6D	548518618	7.29e-06	0.10256
RNRT	AX-109445014	6D	386622365	7.29e-06	0.10256
RNRT	AX-109400964	6D	3964966	7.29e-06	0.10256
RTRV	AX-109568894	4A	772169502	7.32e-06	0.10386
RNRT	AX-110064168	1A	607046846	7.33e-06	0.10281
RNRT	AX-110064168	1A	655085992	7.33e-06	0.10281
RTRL	AX-111550590	4A	25034352	7.36e-06	0.10368
RNRT	AX-110150879	1A	556578	7.37e-06	0.10245
RNRT	AX-111654844	1A	114615086	7.37e-06	0.10245
RNRT	AX-111569721	1A	481114862	7.37e-06	0.10245
RNRT	AX-111654844	1A	493657489	7.37e-06	0.10245
RNRT	AX-110150879	1A	673558379	7.37e-06	0.10245
RNRT	AX-111569721	1A	680192193	7.37e-06	0.10245
RTRL	AX-110568430	5B	484570353	7.39e-06	0.10364
RNRT	AX-109339265	7D	393369931	7.39e-06	0.10244
RNRT	AX-109339265	7D	3802246	7.39e-06	0.10244
RNRT	AX-86164758	6D	388316790	7.42e-06	0.10243
RNRT	AX-86173258	6D	454228572	7.42e-06	0.10243
RNRT	AX-86164758	6D	158981466	7.42e-06	0.10243
RNRT	AX-86173258	6D	682910295	7.42e-06	0.10243
RNRT	AX-95130583	7A	37041200	7.44e-06	0.10593
RNRT	AX-95130583	7A	462465211	7.44e-06	0.10593
RARD	AX-110654069	3B	515119071	7.47e-06	0.10471
RTRV	AX-111192023	4A	78691729	7.49e-06	0.10364
RNRT	AX-109549041	5D	533052303	7.49e-06	0.10255
RNRT	AX-109549041	5D	612327901	7.49e-06	0.10255
RNRT	AX-110999005	3B	720840584	7.5e-06	0.10236
RNRT	AX-110999005	3B	739739178	7.5e-06	0.10236
RTRV	AX-109005230	1D	282407108	7.57e-06	0.10383
RTRV	AX-110973389	3D	97803478	7.59e-06	0.10351
RNRT	AX-109427543	5B	29386641	7.62e-06	0.11163
RNRT	AX-109427543	5B	99404952	7.62e-06	0.11163
RTRV	AX-110611597	4D	99460783	7.65e-06	0.10367
RTRL	AX-110968912	4A	32882578	7.69e-06	0.10357
RTRV	AX-109856517	4A	343911565	7.69e-06	0.10383
RNRT	AX-111214151	7D	62385938	7.73e-06	0.10215
RNRT	AX-111214151	7D	530681951	7.73e-06	0.10215
RTRV	AX-111604026	3B	606777402	7.74e-06	0.10449
